# Supplementary material
Source: bioRxiv or medRxiv preprint supplement (https://www.biorxiv.org/highwire/filestream/10023/field_highwire_adjunct_files/1/037218-2.pdf)

## S2 Figure

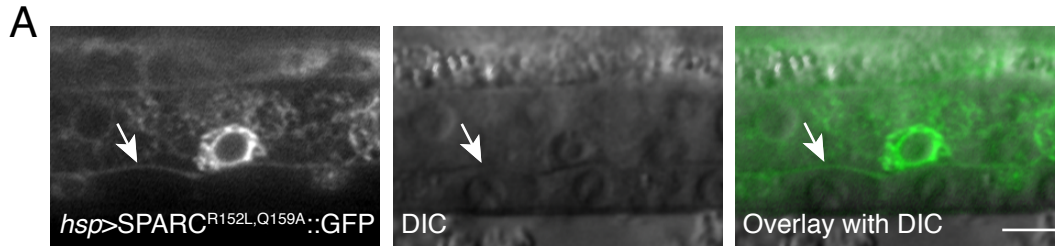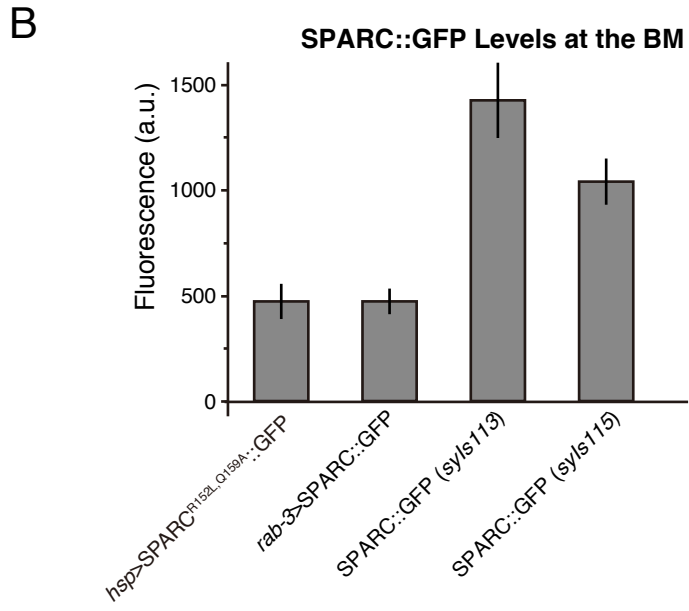

Supplement: Supplementary file [file 037218-2.pdf]
